# Supplementary material for: Aluminium complexes of phenoxy-azo ligands in the catalysis of rac-lactide polymerisation
Source: Royal Society of Chemistry journal article supplement (doi:10.1039/d4dt01758g), 2024-01-01
Supplement: d4dt01758g1.pdf [file d4dt01758g1.pdf]

## Electronic Supplementary Information

For

### Aluminum Complexes of Phenoxy-Azo Ligands in Catalysis of *rac*-Lactide Polymerisation

*Pattarawut Sumrit,<sup>a,b</sup> Sirawan Kamavichanurat,<sup>a,b</sup> Wasan Joopor,<sup>a,b</sup> Worawat Wattanathana,<sup>c</sup>  
Chutikan Nakornkhet,<sup>a,b</sup> and Pimpa Hormnirun<sup>\*,a,b</sup>*

<sup>a</sup>Laboratory of Catalysts and Advanced Polymer Materials, Department of Chemistry and  
Center of Excellence for Innovation in Chemistry, Faculty of Science, Kasetsart University,  
Bangkok 10900, Thailand

<sup>b</sup>Centre for Advanced Studies in Nanotechnology for Chemical, Food and Agricultural  
Industries, Kasetsart University, Bangkok 10900, Thailand

<sup>c</sup>Department of Materials Engineering, Faculty of Engineering, Kasetsart University, Bangkok 10900,  
Thailand

\*E-mail: fscipph@ku.ac.th

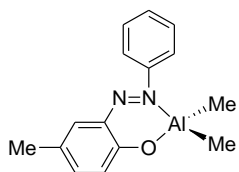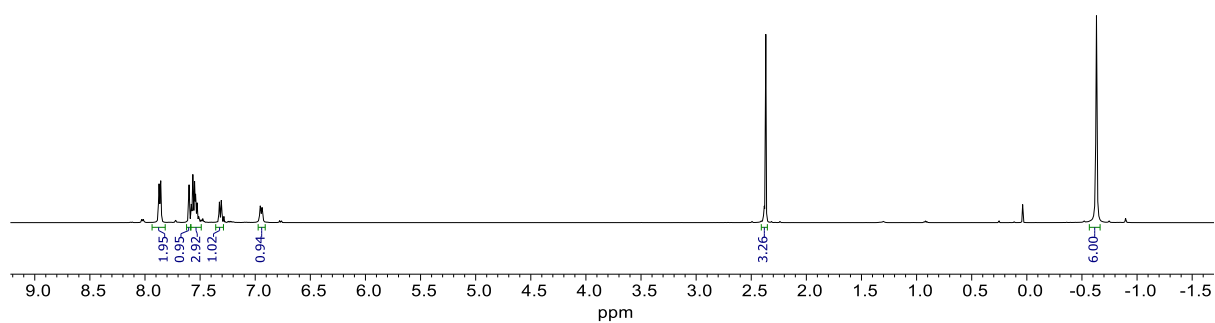

**Fig. S1**  $^1\text{H}$  NMR spectrum of **1a** in  $\text{CDCl}_3$  at 298 K.

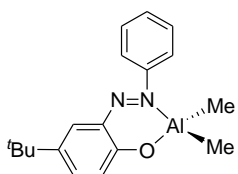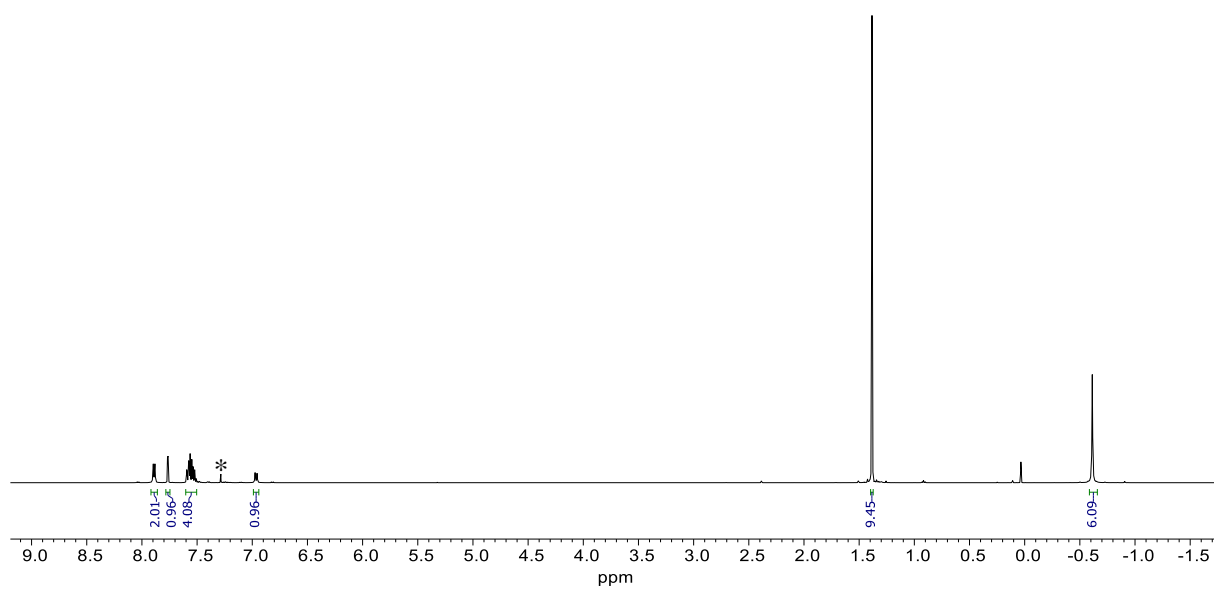

**Fig. S2**  $^1\text{H}$  NMR spectrum of **2a** in  $\text{CDCl}_3$  at 298 K (\* = solvent residue signal).

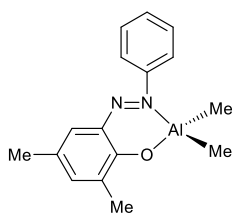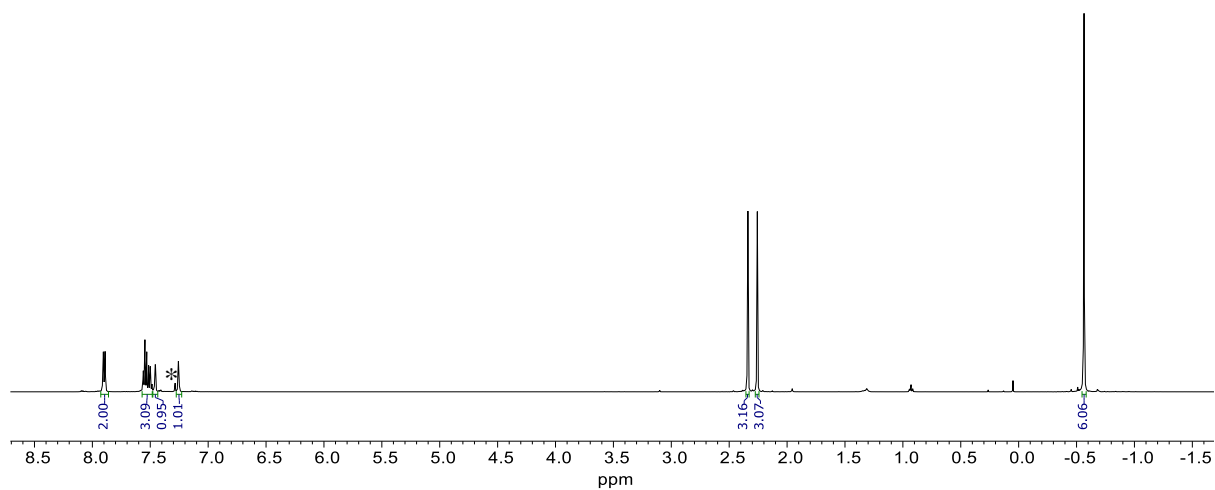

**Fig. S3**  $^1\text{H}$  NMR spectrum of **3a** in  $\text{CDCl}_3$  at 298 K (\* = solvent residue signal).

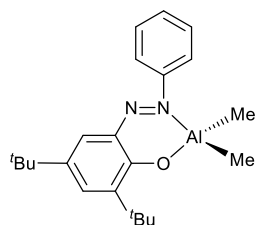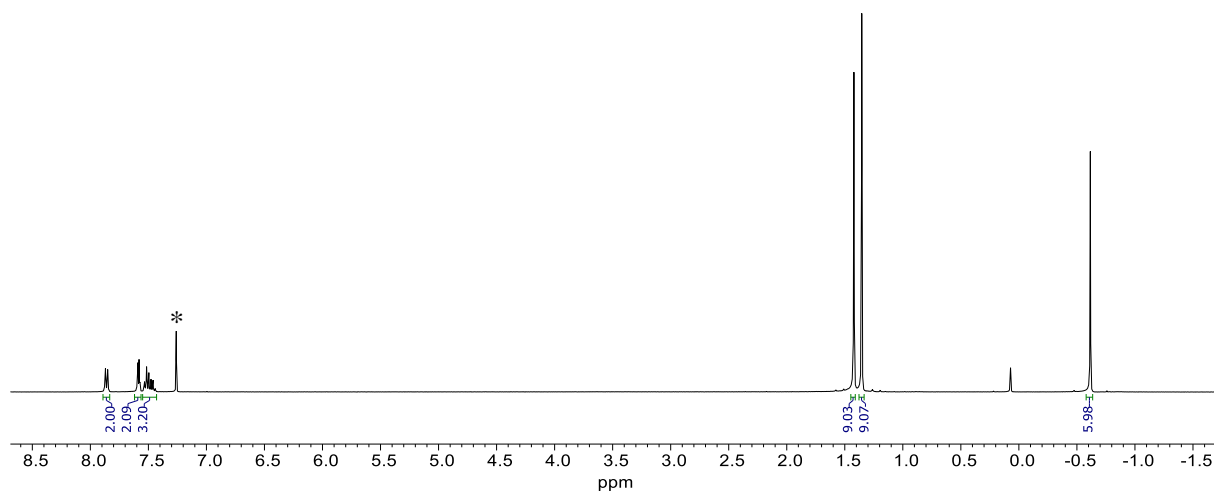

**Fig. S4**  $^1\text{H}$  NMR spectrum of **4a** in  $\text{CDCl}_3$  at 298 K (\* = solvent residue signal).

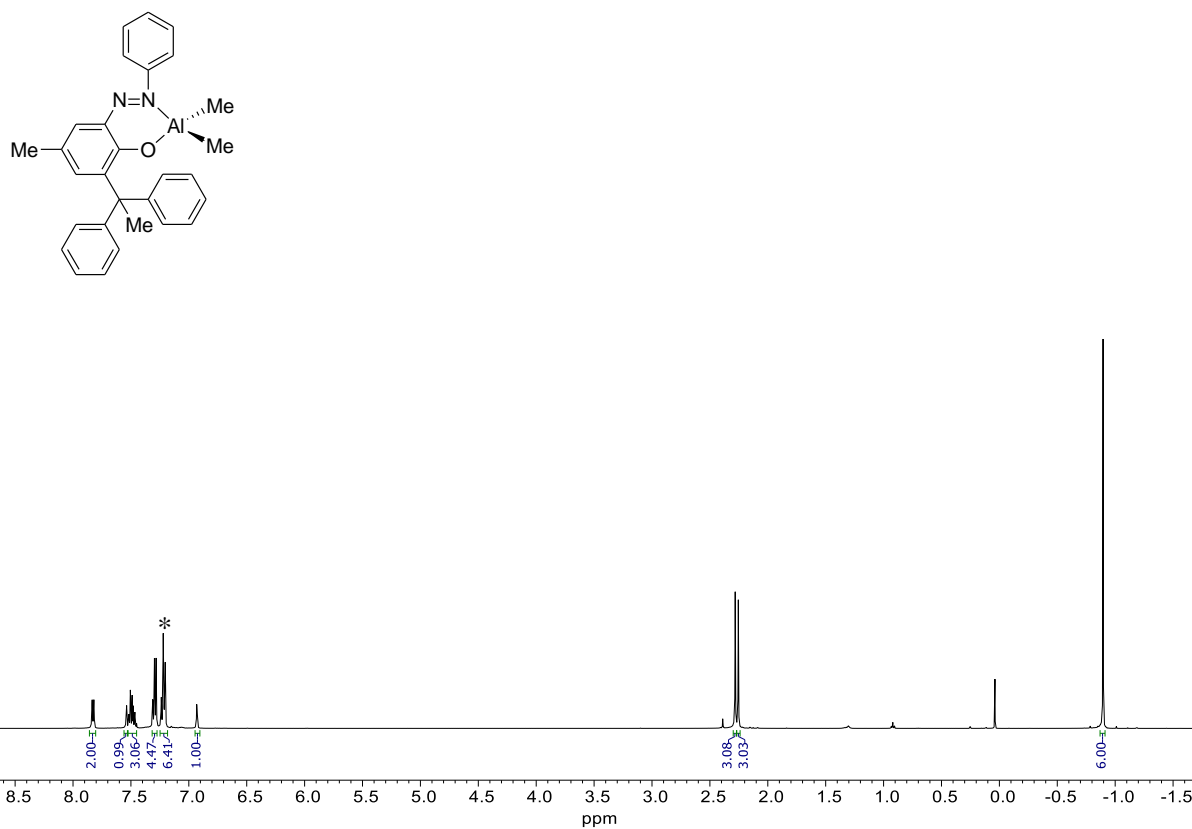

**Fig. S5** <sup>1</sup>H NMR spectrum of **5a** in CDCl<sub>3</sub> at 298 K (\* = solvent residue signal).

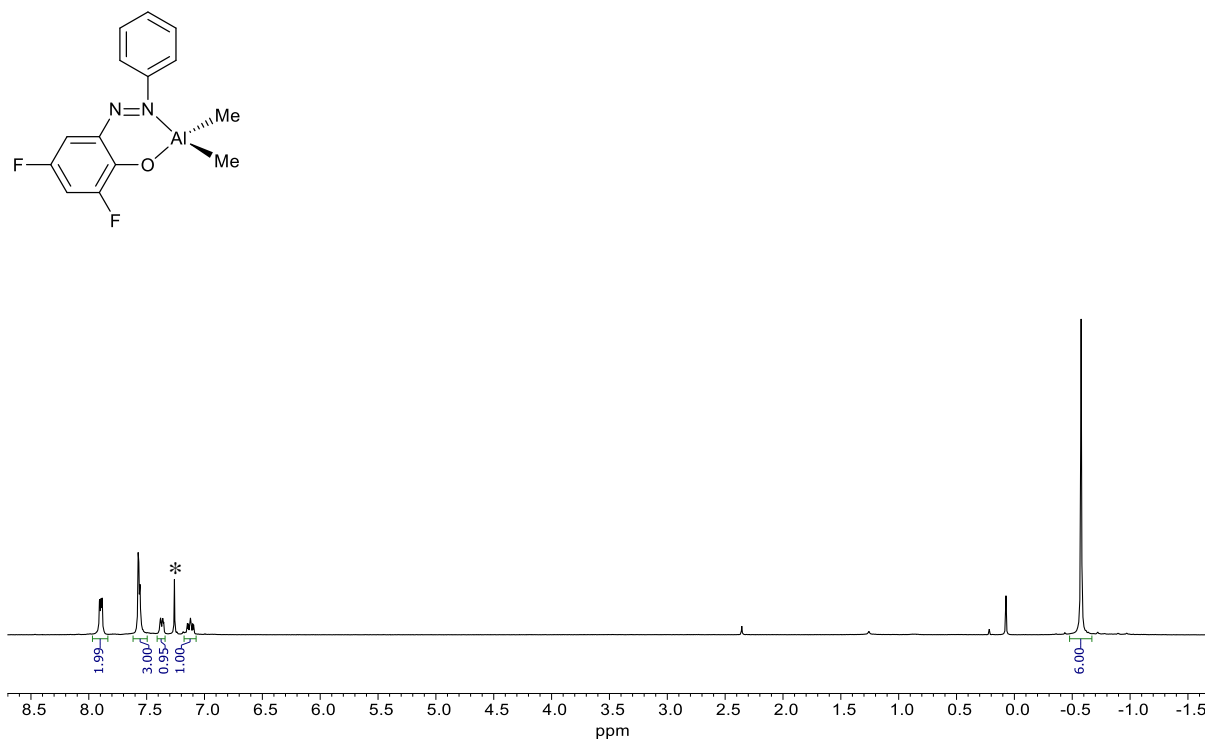

**Fig. S6** <sup>1</sup>H NMR spectrum of **6a** in CDCl<sub>3</sub> at 298 K (\* = solvent residue signal).

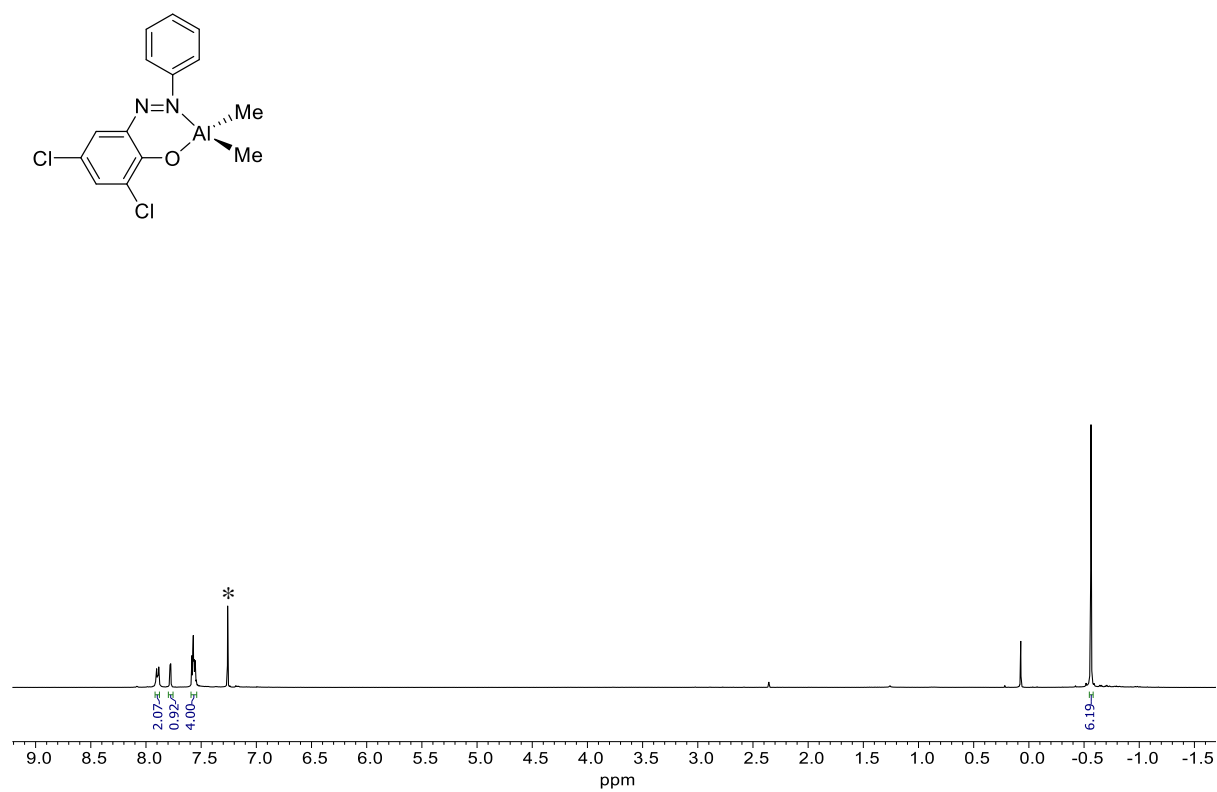

**Fig. S7** <sup>1</sup>H NMR spectrum of **7a** in CDCl<sub>3</sub> at 298 K (\* = solvent residue signal).

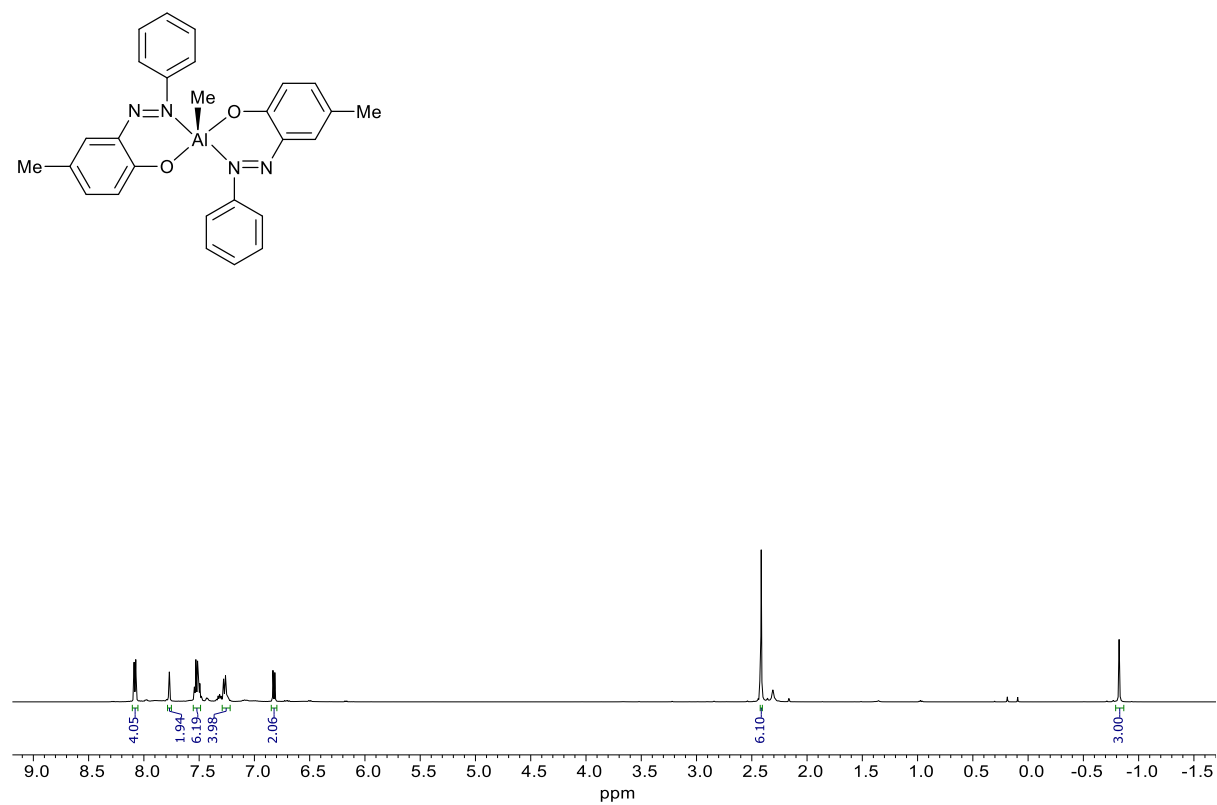

**Fig. S8** <sup>1</sup>H NMR spectrum of **1b** in CDCl<sub>3</sub> at 298 K.

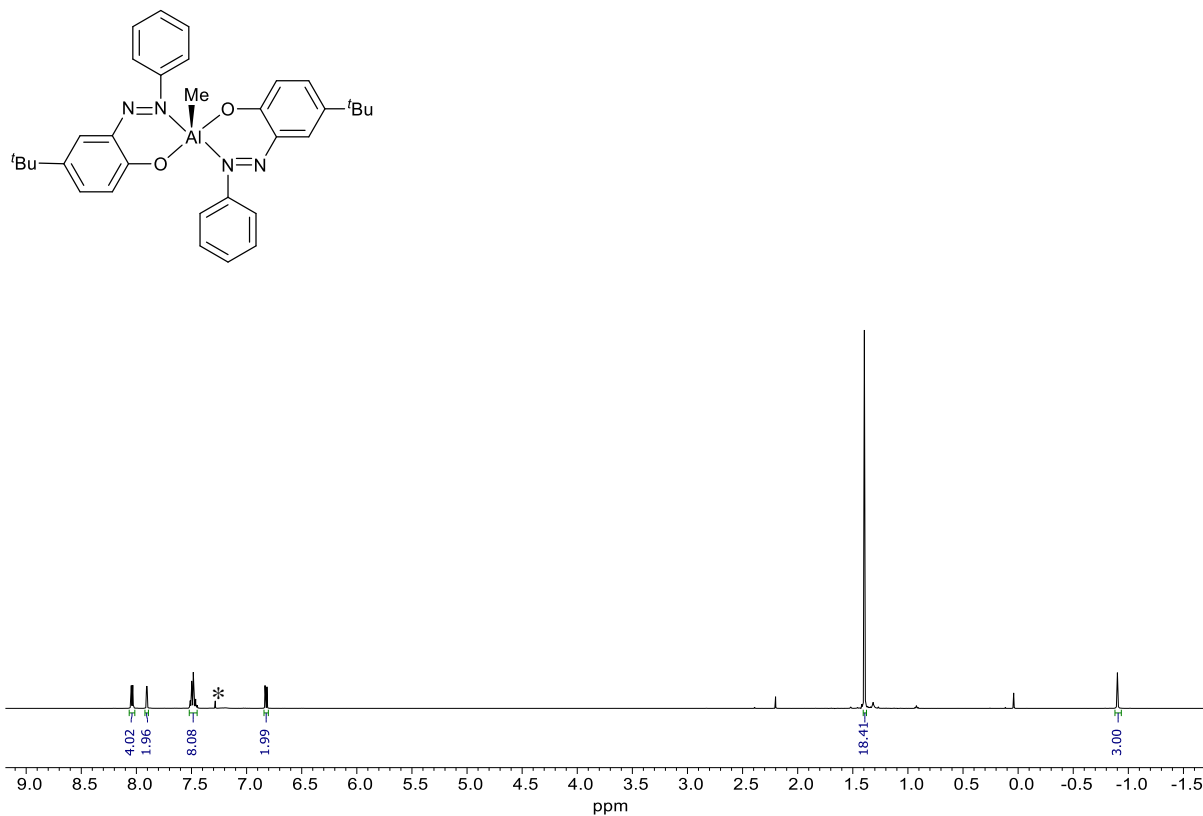

**Fig. S9**  $^1\text{H}$  NMR spectrum of **2b** in  $\text{CDCl}_3$  at 298 K (\* = solvent residue signal).

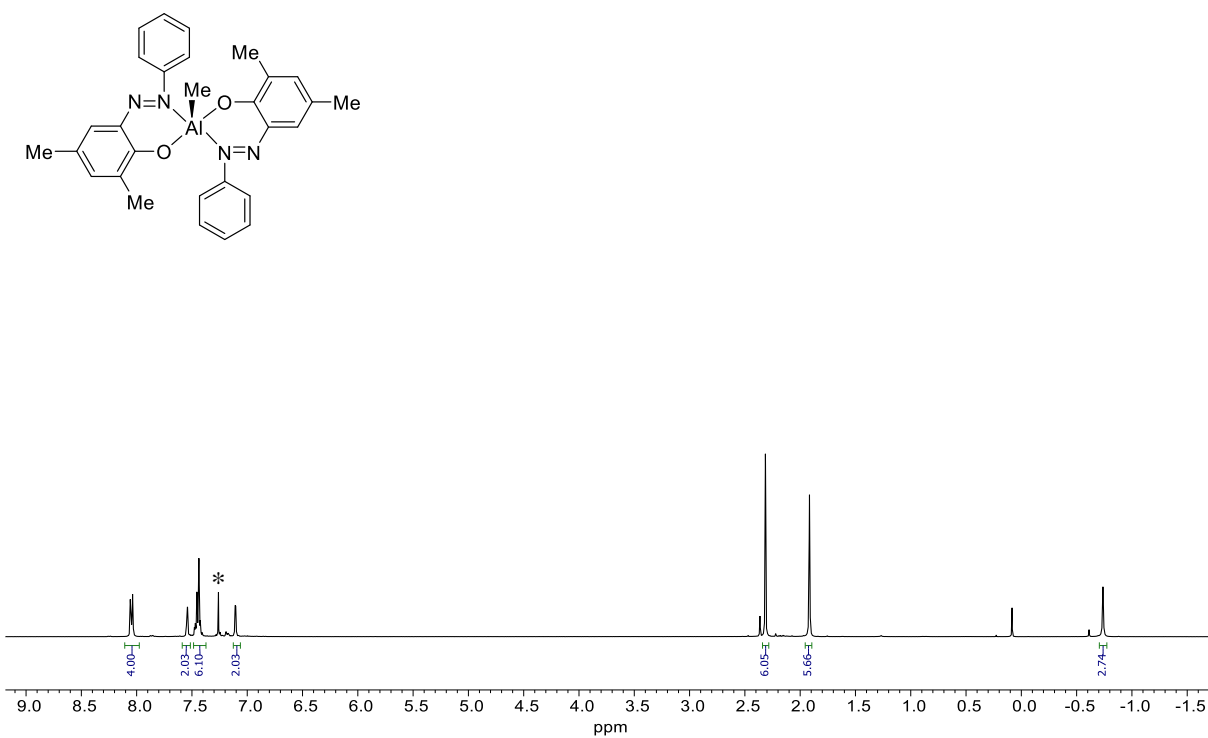

**Fig. S10**  $^1\text{H}$  NMR spectrum of **3b** in  $\text{CDCl}_3$  at 298 K (\* = solvent residue signal).

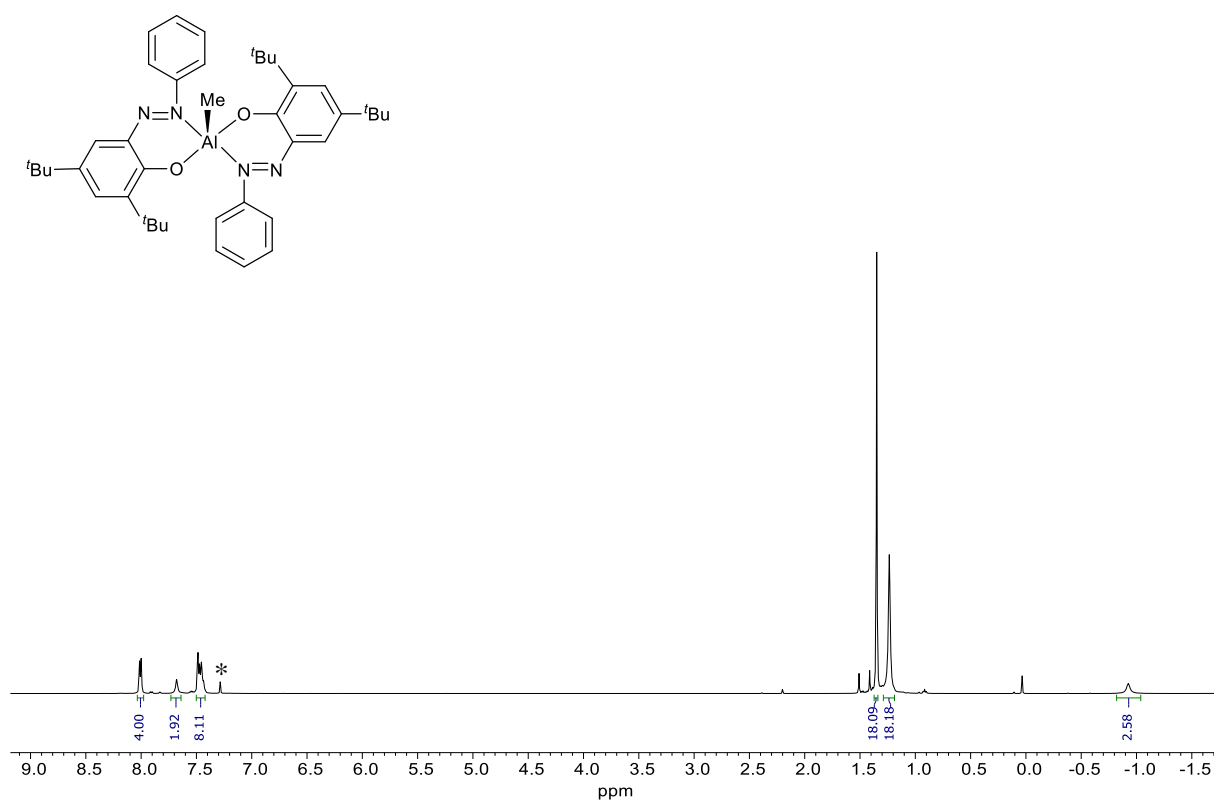

**Fig. S11**  $^1\text{H}$  NMR spectrum of **4b** in  $\text{CDCl}_3$  at 298 K (\* = solvent residue signal).

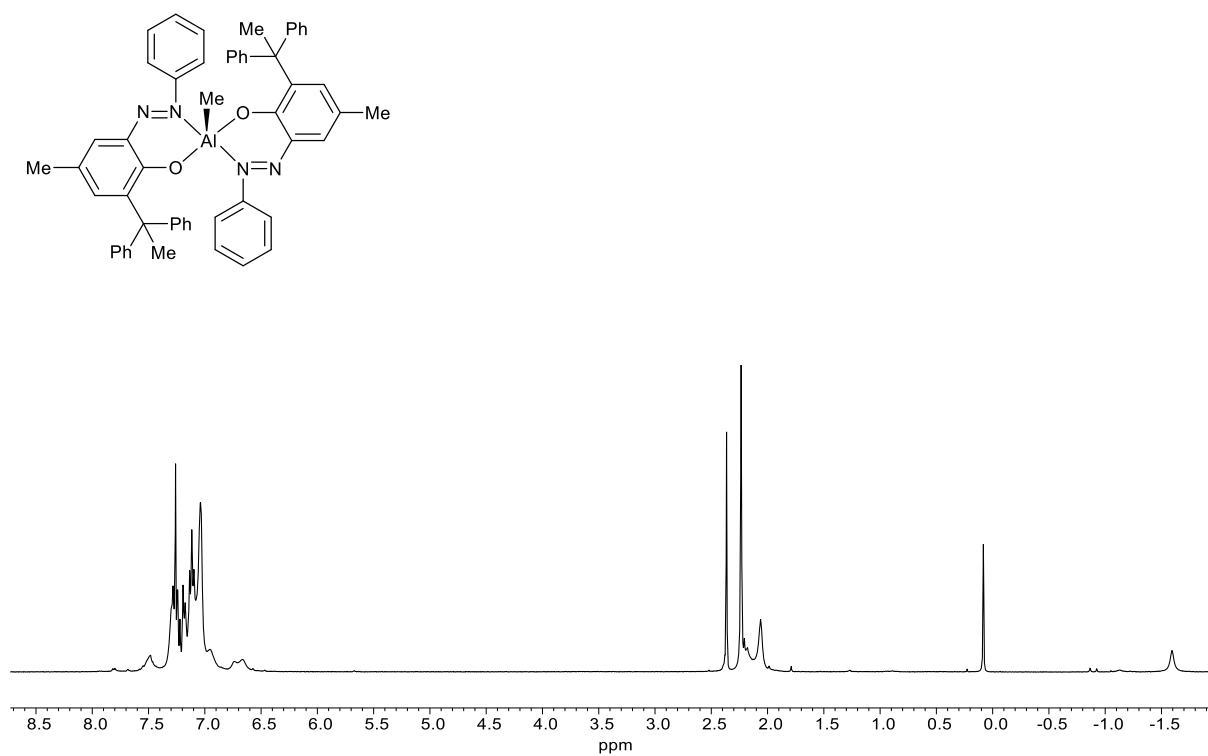

**Fig. S12**  $^1\text{H}$  NMR spectrum of **5b** in  $\text{CDCl}_3$  at 298 K.

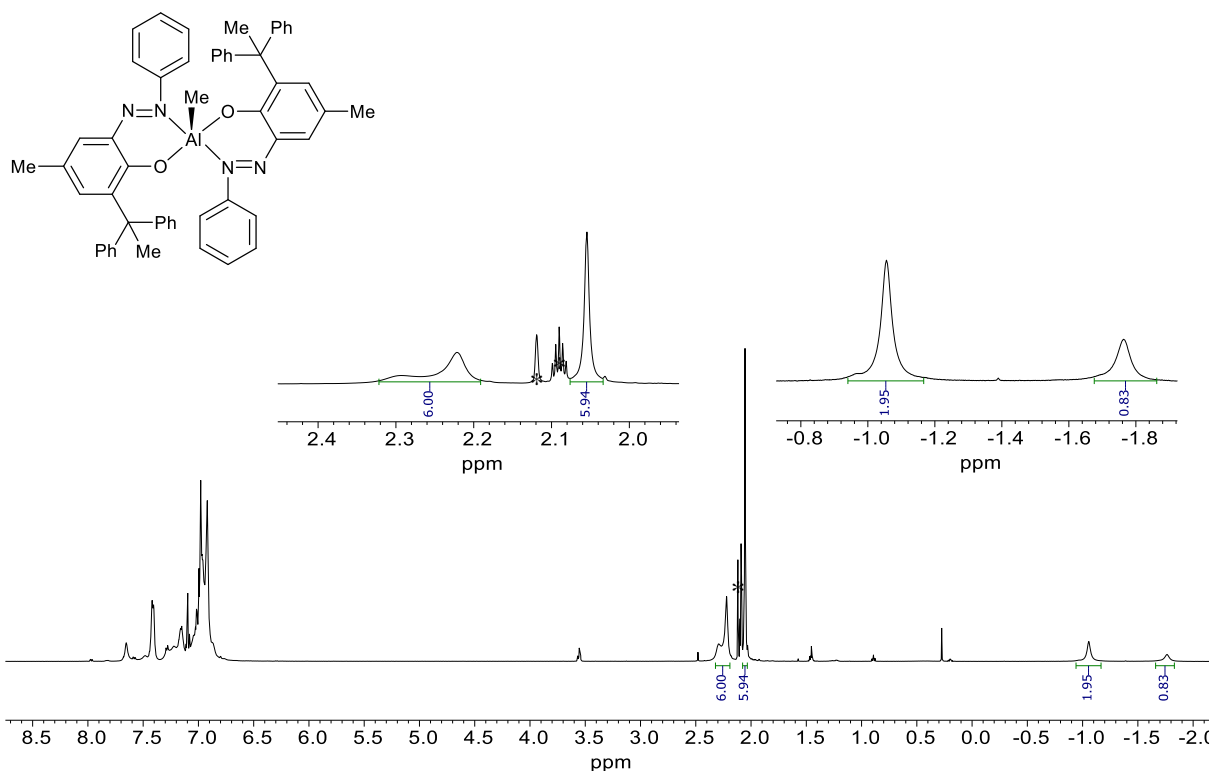

**Fig. S13**  $^1\text{H}$  NMR spectrum of **5b** in toluene- $d_8$  at 298 K (\* = solvent residue signal).

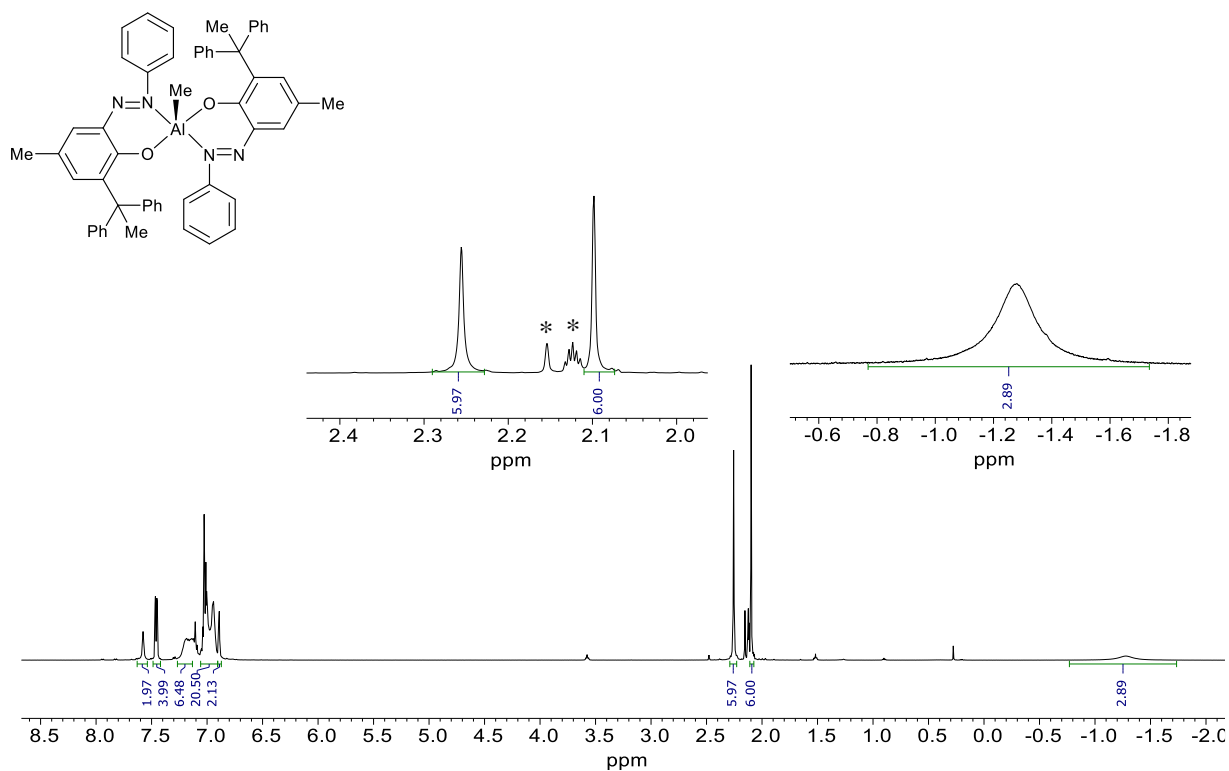

**Fig. S14**  $^1\text{H}$  NMR spectrum of **5b** in toluene- $d_8$  at 343 K (\* = solvent residue signal).



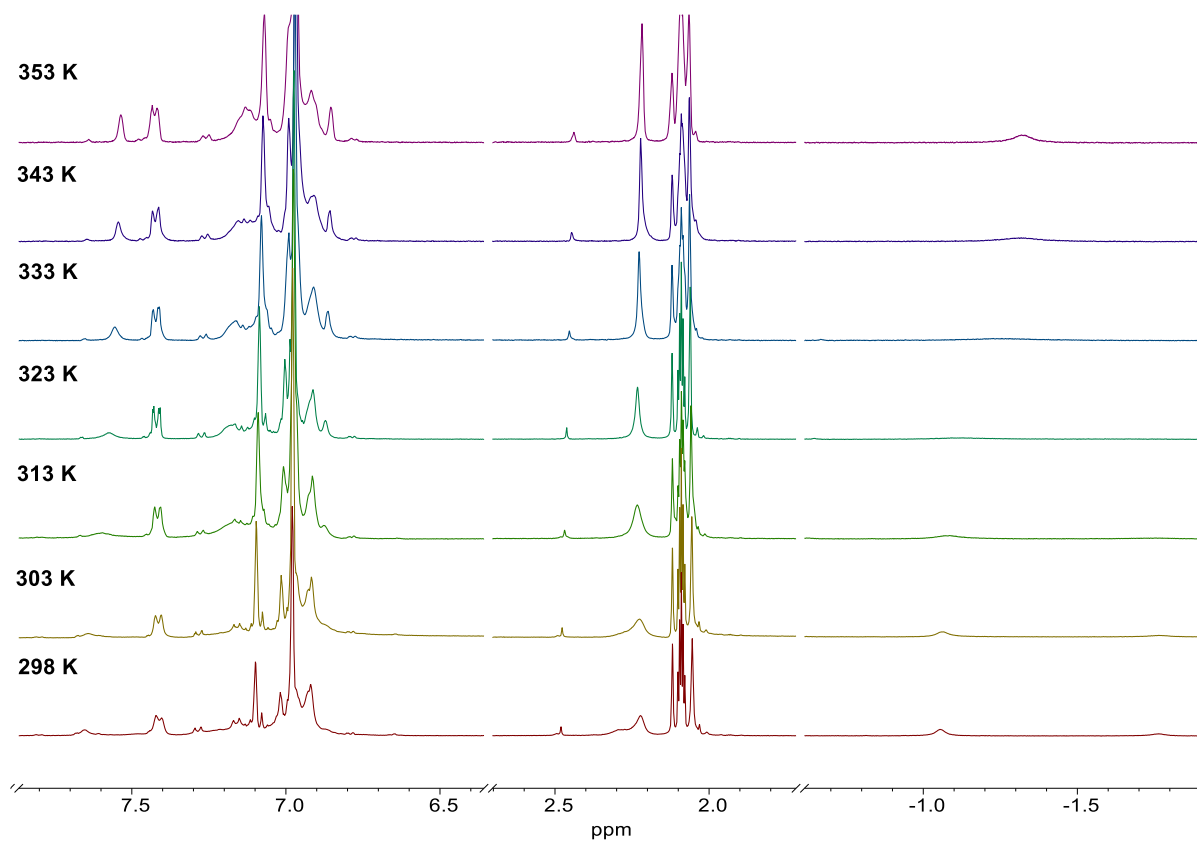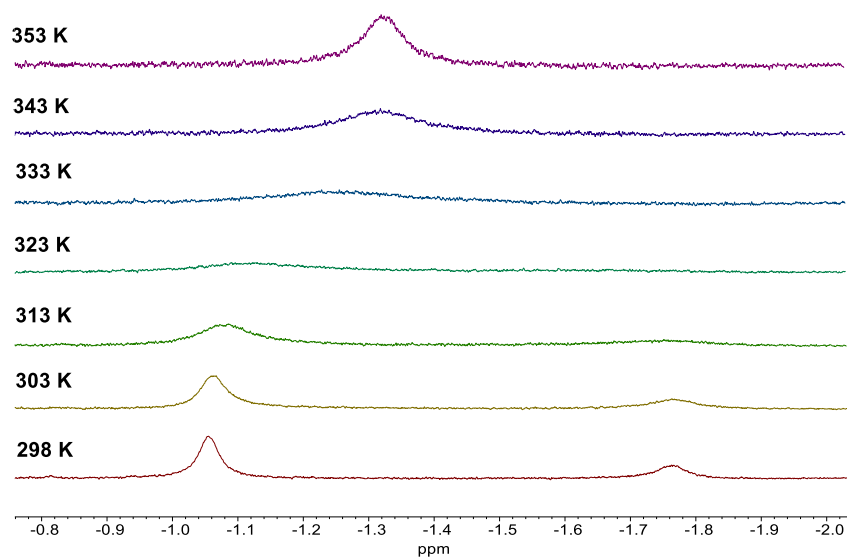

Fig. S15 VT <sup>1</sup>H NMR spectra of **5b** in toluene-d<sub>8</sub>.

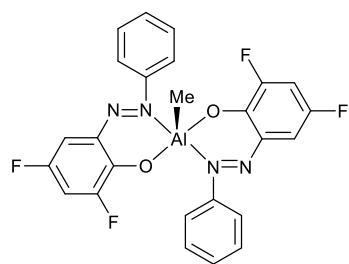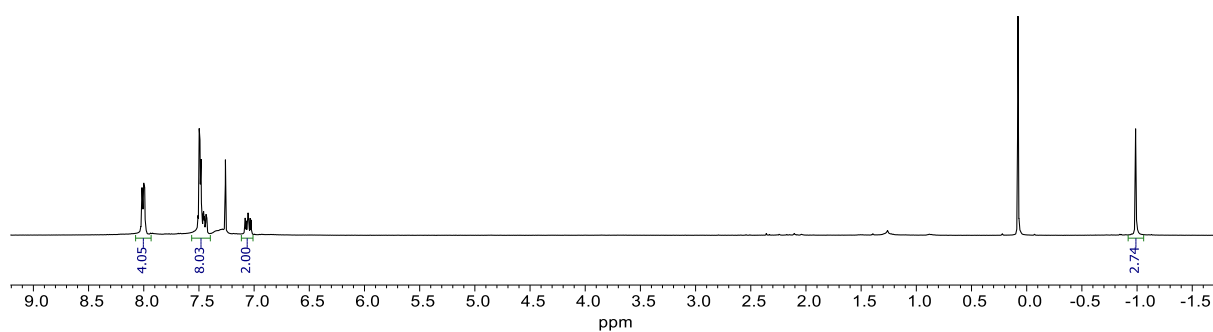

**Fig. S16**  $^1\text{H}$  NMR spectrum of **6b** in  $\text{CDCl}_3$  at 298 K (\* = solvent residue signal).

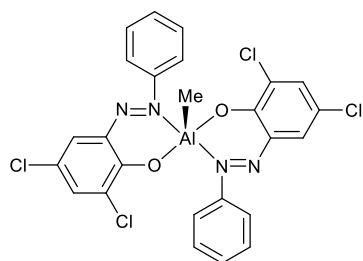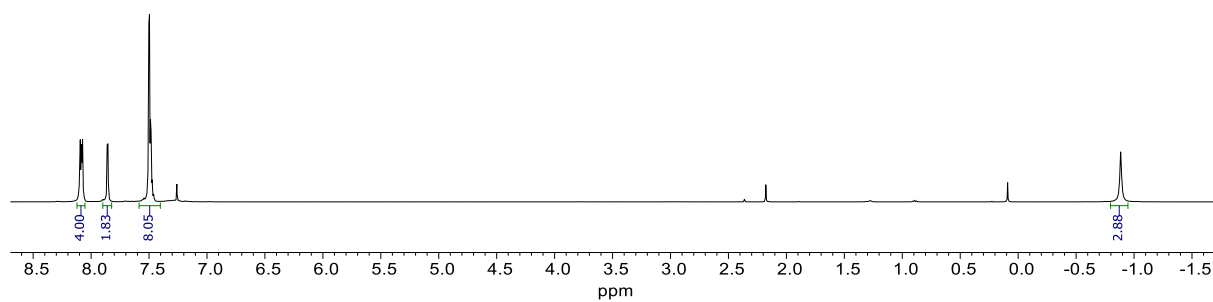

**Fig. S17**  $^1\text{H}$  NMR spectrum of **7b** in  $\text{CDCl}_3$  at 298 K (\* = solvent residue signal).

**Table S1** Crystallographic data and structure refinement details for complex **4a**.

| <b>Crystal and refinement data</b>          | <b>Complex 4a</b>                                             |
|---------------------------------------------|---------------------------------------------------------------|
| Empirical formula                           | C <sub>16</sub> H <sub>19</sub> AlN <sub>2</sub> O            |
| Formula weight                              | 282.31                                                        |
| Temperature/K                               | 100                                                           |
| Crystal system                              | triclinic                                                     |
| Space group                                 | P-1                                                           |
| a/Å                                         | 7.3646(6)                                                     |
| b/Å                                         | 9.4194(8)                                                     |
| c/Å                                         | 11.4053(10)                                                   |
| α/°                                         | 77.248(2)                                                     |
| β/°                                         | 80.825(2)                                                     |
| γ/°                                         | 82.816(2)                                                     |
| Volume/Å <sup>3</sup>                       | 758.47(11)                                                    |
| Z                                           | 2                                                             |
| ρ <sub>calc</sub> /g/cm <sup>3</sup>        | 1.236                                                         |
| μ/mm <sup>-1</sup>                          | 1.139                                                         |
| F(000)                                      | 300.0                                                         |
| Crystal size/mm <sup>3</sup>                | 0.15 × 0.15 × 0.15                                            |
| Radiation                                   | CuKα (λ = 1.54178)                                            |
| 2θ range for data collection/°              | 9.67 to 144.268                                               |
| Index ranges                                | -9 ≤ h ≤ 9, -11 ≤ k ≤ 11, -14 ≤ l ≤ 13                        |
| Reflections collected                       | 11471                                                         |
| Independent reflections                     | 2940 [R <sub>int</sub> = 0.0223, R <sub>sigma</sub> = 0.0219] |
| Data/restraints/parameters                  | 2940/0/185                                                    |
| Goodness-of-fit on F <sup>2</sup>           | 1.065                                                         |
| Final R indexes [I >= 2σ (I)]               | R <sub>1</sub> = 0.0314, wR <sub>2</sub> = 0.0825             |
| Final R indexes [all data]                  | R <sub>1</sub> = 0.0316, wR <sub>2</sub> = 0.0826             |
| Largest diff. peak/hole / e Å <sup>-3</sup> | 0.27/-0.27                                                    |

**Table S2** Bond lengths (Å) and bond angles (°) for complex **4a**.

---

| <b>Bond lengths (Å)</b> |            |        |            |         |            |
|-------------------------|------------|--------|------------|---------|------------|
| Al1-O1                  | 1.7770(9)  | C1-C2  | 1.3919(16) | C10-C11 | 1.3726(17) |
| Al1-N1                  | 2.0012(10) | C1-C6  | 1.3943(16) | C11-C12 | 1.4114(17) |
| Al1-C7                  | 1.9581(12) | C2-C3  | 1.3867(18) | C11-C15 | 1.5071(16) |
| Al1-C8                  | 1.9568(13) | C3-C4  | 1.3945(18) | C12-C13 | 1.3816(17) |
| O1-C14                  | 1.3214(14) | C4-C5  | 1.3819(17) | C13-C14 | 1.4138(16) |
| N1-N2                   | 1.2852(14) | C5-C6  | 1.3977(17) | C13-C16 | 1.5050(16) |
| N1-C6                   | 1.4358(14) | C9-C10 | 1.4182(16) |         |            |
| N2-C9                   | 1.3762(15) | C9-C14 | 1.4209(16) |         |            |

  

| <b>Bond angles (°)</b> |            |            |            |             |            |
|------------------------|------------|------------|------------|-------------|------------|
| O1-Al1-N1              | 93.45(4)   | C2-C1-C6   | 119.75(11) | C9-C10-C11  | 121.41(11) |
| O1-Al1-C7              | 109.97(5)  | C1-C2-C3   | 120.16(11) | C10-C11-C12 | 117.50(11) |
| O1-Al1-C8              | 111.69(5)  | C2-C3-C4   | 119.5(2)   | C10-C11-C15 | 122.09(11) |
| N1-Al1-C7              | 112.79(5)  | C3-C4-C5   | 120.54(11) | C12-C11-C15 | 120.40(11) |
| N1-Al1-C8              | 107.98(5)  | C4-C5-C6   | 119.58(11) | C11-C12-C13 | 123.51(11) |
| C7-Al1-C8              | 118.22(6)  | N1-C6-C1   | 118.00(10) | C12-C13-C14 | 118.89(11) |
| Al1-O1-C14             | 127.99(7)  | N1-C6-C5   | 121.84(10) | C12-C13-C16 | 122.17(10) |
| Al1-N1-N2              | 124.71(8)  | C1-C6-C5   | 120.13(10) | C14-C13-C16 | 118.94(11) |
| Al1-N1-C6              | 122.07(8)  | N2-C9-C10  | 112.94(10) | O1-C14-C9   | 121.85(10) |
| N2-N1-C6               | 113.02(9)  | N2-C9-C14  | 127.04(10) | O1-C14-C13  | 119.45(10) |
| N1-N2-C9               | 121.98(10) | C10-C9-C14 | 119.99(10) | C9-C14-C13  | 118.69(10) |

---

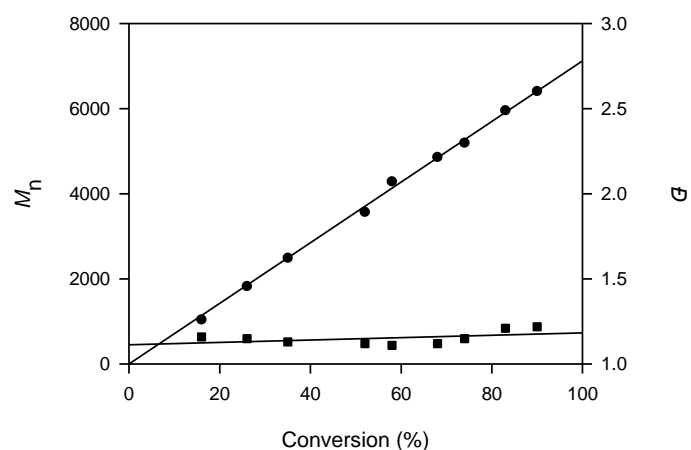

**Fig. S18** Plot of PLA  $M_n$  (●) (versus polystyrene standards) and PDI (○) as a function of monomer conversion for a *rac*-LA polymerisation using **1b**/PhCH<sub>2</sub>OH ( $[LA]_0/[Al] = 50$ , toluene, 70 °C).

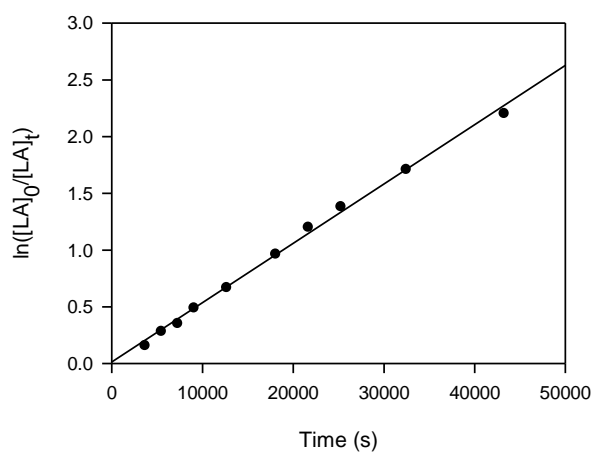

**Fig. S19** Semilogarithmic plots of *rac*-lactide conversion *versus* time in toluene at 70 °C with complexes **1a** (●) ( $[LA]_0/[Al]/[PhCH_2OH] = 50:1:1$ ,  $[LA]_0 = 0.42$  M,  $[Al] = 8.33$  mM).

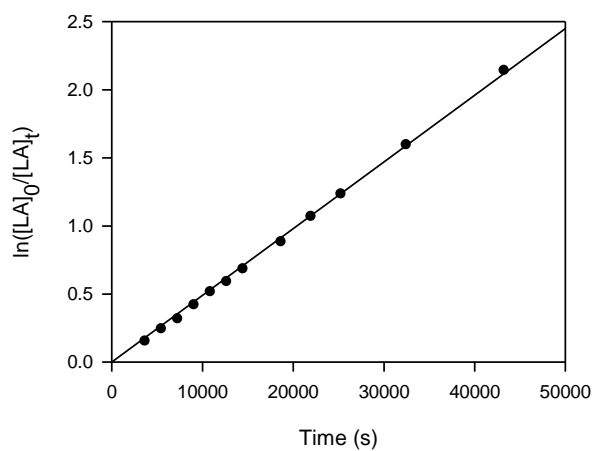

**Fig. S20** Semilogarithmic plots of *rac*-lactide conversion *versus* time in toluene at 70 °C with complex **2a** (●) ( $[LA]_0/[Al]/[PhCH_2OH] = 50:1:1$ ,  $[LA]_0 = 0.42$  M,  $[Al] = 8.33$  mM).

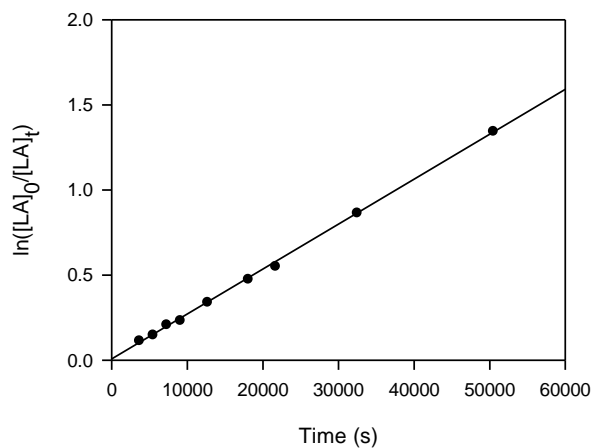

**Fig. S21** Semilogarithmic plots of *rac*-lactide conversion *versus* time in toluene at 70 °C with complex **4a** (●) ( $[LA]_0/[Al]/[PhCH_2OH] = 50:1:1$ ,  $[LA]_0 = 0.42$  M,  $[Al] = 8.33$  mM).

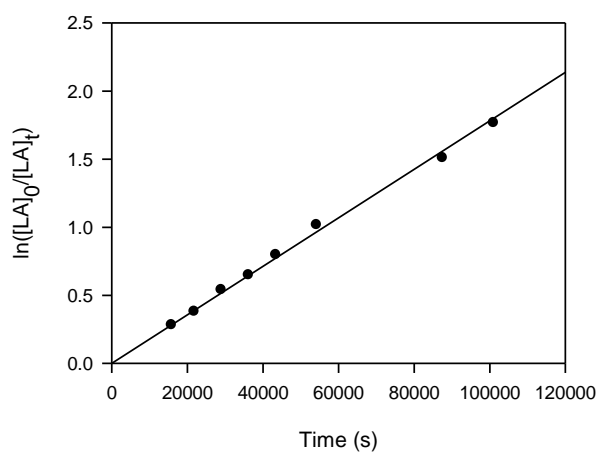

**Fig. S22** Semilogarithmic plots of *rac*-lactide conversion *versus* time in toluene at 70 °C with complex **5a** (●) ( $[LA]_0/[Al]/[PhCH_2OH] = 50:1:1$ ,  $[LA]_0 = 0.42$  M,  $[Al] = 8.33$  mM).

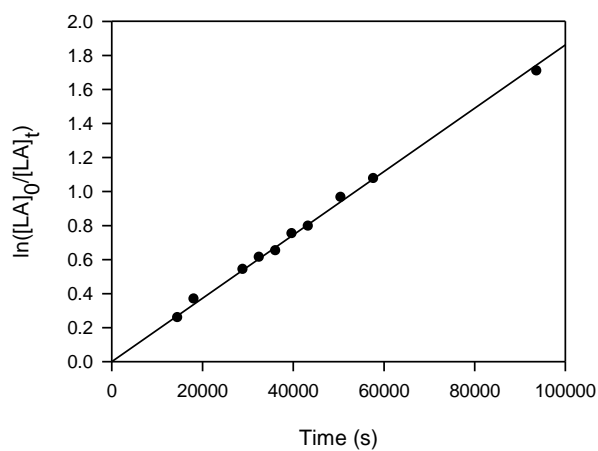

**Fig. S23** Semilogarithmic plots of *rac*-lactide conversion *versus* time in toluene at 70 °C with complexes **6a** (●) ( $[LA]_0/[Al]/[PhCH_2OH] = 50:1:1$ ,  $[LA]_0 = 0.42$  M,  $[Al] = 8.33$  mM).

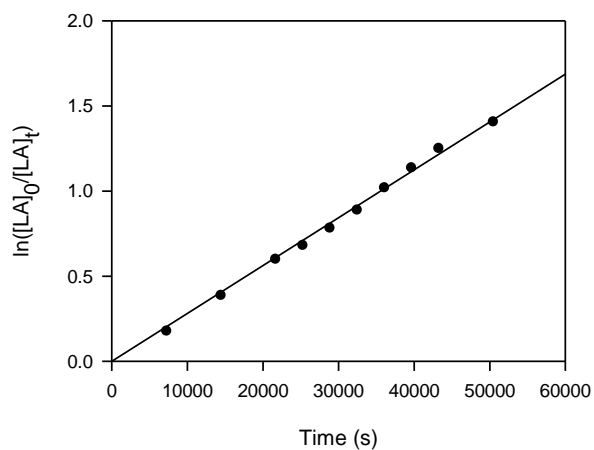

**Fig. S24** Semilogarithmic plots of *rac*-lactide conversion *versus* time in toluene at 70 °C with complex **7a** (●) ( $[LA]_0/[Al]/[PhCH_2OH] = 50:1:1$ ,  $[LA]_0 = 0.42$  M,  $[Al] = 8.33$  mM).

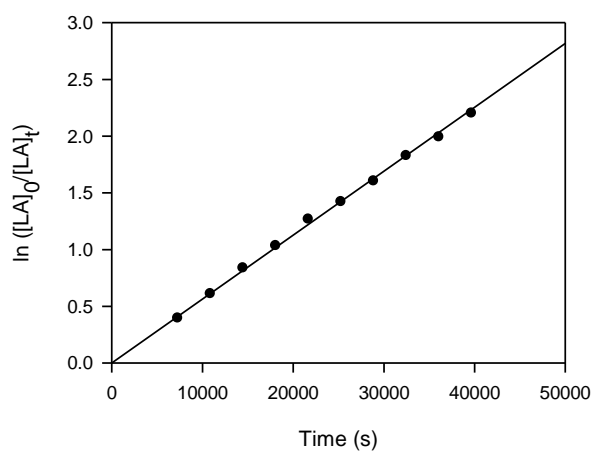

**Fig. S25** Semilogarithmic plots of *rac*-lactide conversion *versus* time in toluene at 70 °C with complexes **1b** (●) ( $[LA]_0/[Al]/[BnOH] = 50:1:1$ ,  $[LA]_0 = 0.42$  M,  $[Al] = 8.33$  mM).

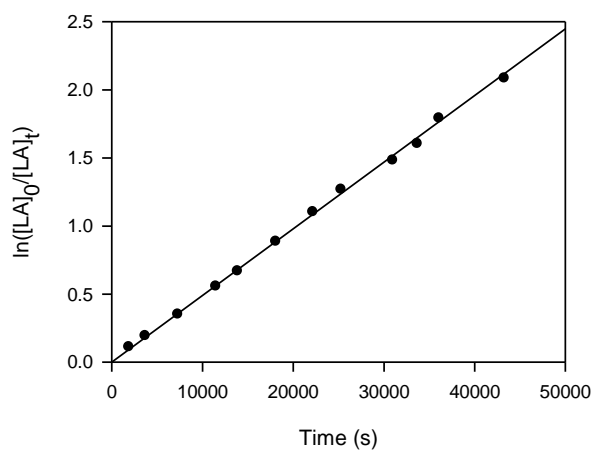

**Fig. S26.** Semilogarithmic plots of *rac*-lactide conversion *versus* time in toluene at 70 °C with complex **2b** (●) ( $[LA]_0/[Al]/[BnOH] = 50:1:1$ ,  $[LA]_0 = 0.42$  M,  $[Al] = 8.33$  mM).

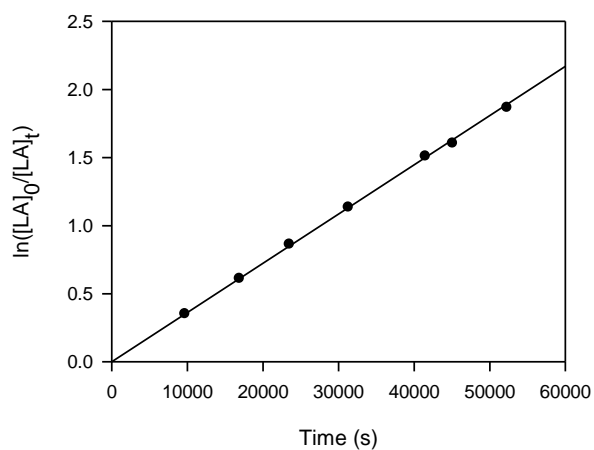

**Fig. S27** Semilogarithmic plots of *rac*-lactide conversion *versus* time in toluene at 70 °C with complex **3b** (●) ( $[LA]_0/[Al]/[BnOH] = 50:1:1$ ,  $[LA]_0 = 0.42$  M,  $[Al] = 8.33$  mM).

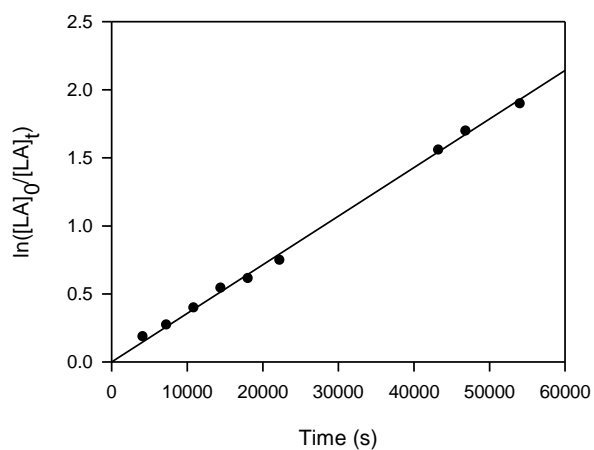

**Fig. S28** Semilogarithmic plots of *rac*-lactide conversion *versus* time in toluene at 70 °C with complex **4b** (●) ( $[LA]_0/[Al]/[BnOH] = 50:1:1$ ,  $[LA]_0 = 0.42$  M,  $[Al] = 8.33$  mM).

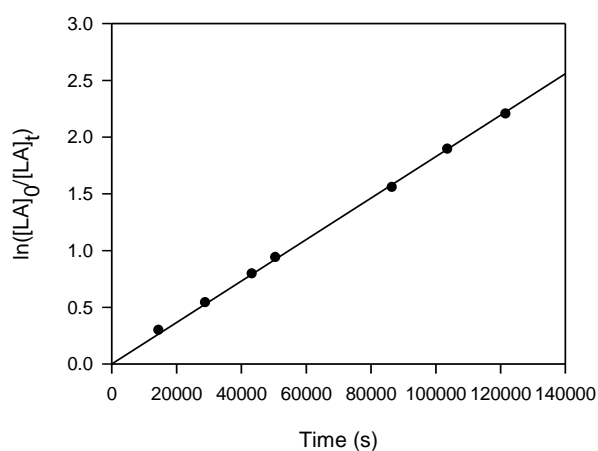

**Fig. S29** Semilogarithmic plots of *rac*-lactide conversion *versus* time in toluene at 70 °C with complex **5b** (●) ( $[LA]_0/[Al]/[BnOH] = 50:1:1$ ,  $[LA]_0 = 0.42$  M,  $[Al] = 8.33$  mM).



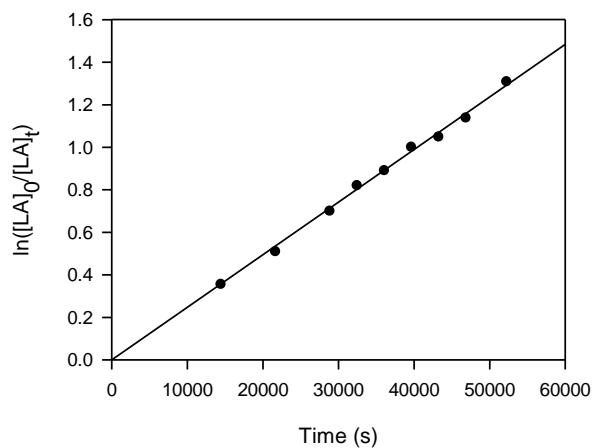

**Fig. S30** Semilogarithmic plots of *rac*-lactide conversion *versus* time in toluene at 70 °C with complex **6b** (●) ( $[LA]_0/[Al]/[BnOH] = 50:1:1$ ,  $[LA]_0 = 0.42$  M,  $[Al] = 8.33$  mM).

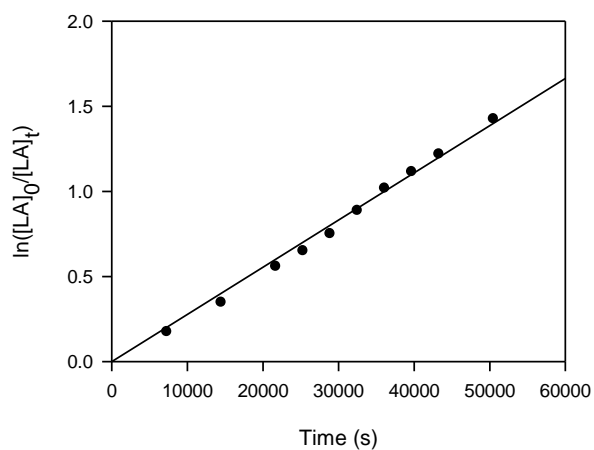

**Fig. S31** Semilogarithmic plots of *rac*-lactide conversion *versus* time in toluene at 70 °C with complex **7b** (●) ( $[LA]_0/[Al]/[BnOH] = 50:1:1$ ,  $[LA]_0 = 0.42$  M,  $[Al] = 8.33$  mM).

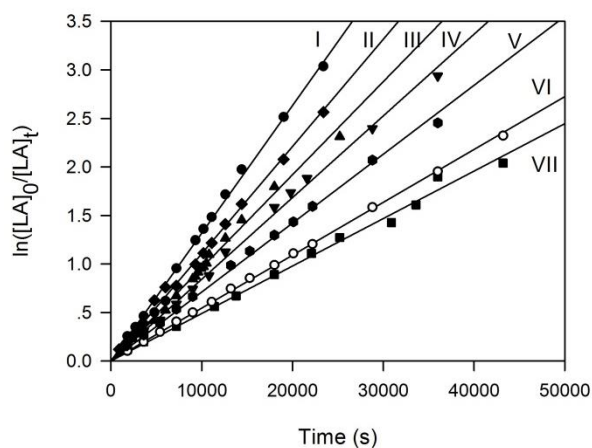

**Fig. S32** Semilogarithmic plots of the *rac*-lactide conversion versus time in toluene at 70 °C with complex **2b**/BnOH as an initiator ( $[LA]_0 = 0.42$  M: **I**,  $[Al] = 24.99$  mM,  $[LA]_0/[Al] = 17$ ; **II**,  $[Al] = 20.82$  mM,  $[LA]_0/[Al] = 20$ ; **III**,  $[Al] = 16.66$  mM,  $[LA]_0/[Al] = 25$ ; **IV**,  $[Al] = 14.58$  mM,  $[LA]_0/[Al] = 29$ ; **V**,  $[Al] = 12.50$  mM,  $[LA]_0/[Al] = 34$ ; **VI**,  $[Al] = 10.41$  mM,  $[LA]_0/[Al] = 40$ ; **VII**,  $[Al] = 8.33$  mM  $[LA]_0/[Al] = 50$ ).

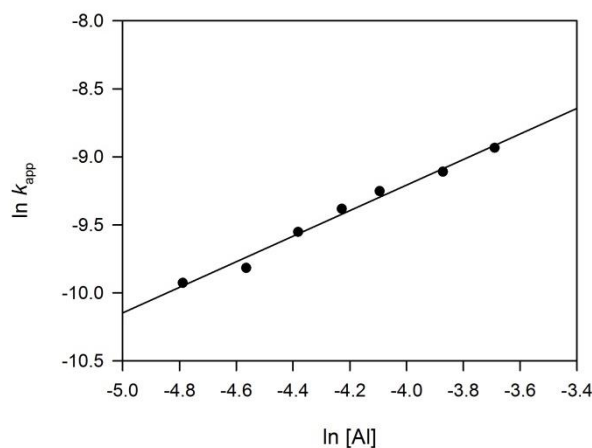

**Fig. S33** Plot of  $\ln k_{app}$  versus  $\ln [Al]$  for the polymerisation of *rac*-lactide with complex **2b**/BnOH as an initiator (toluene, 70 °C,  $[LA]_0 = 0.42$  M).

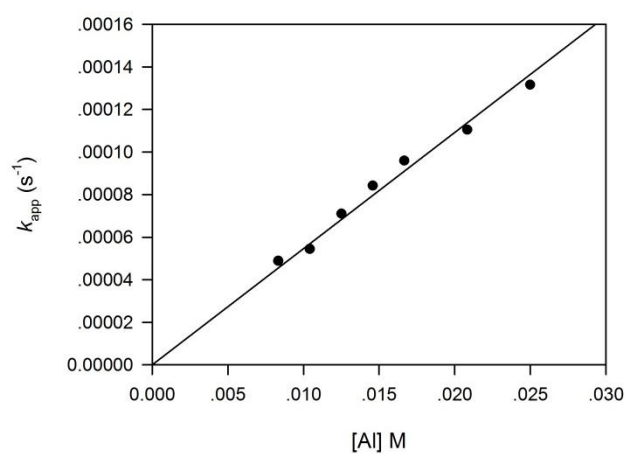

**Fig. S34** Plot of  $k_{app}$  versus  $[Al]$  for the polymerisation of *rac*-lactide with complex **2b**/BnOH as an initiator (toluene, 70 °C,  $[LA]_0 = 0.42$  M).

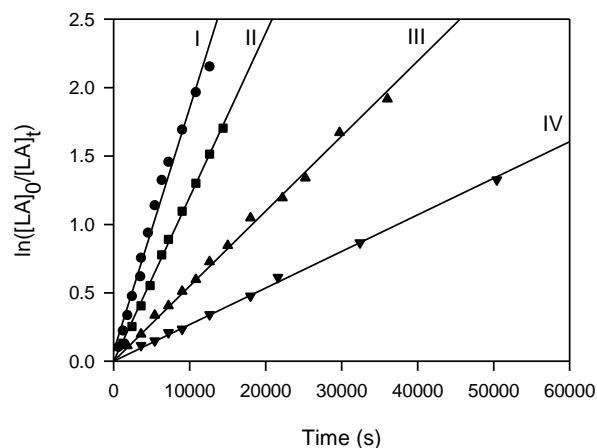

**Fig. S35** Semilogarithmic plots of the *rac*-lactide conversion versus time in toluene with complex **4a**/BnOH as an initiator at **I**, 100 °C,  $k_{app} = (18.71 \pm 0.43) \times 10^{-5} \text{ s}^{-1}$ ; **II**, 90 °C,  $k_{app} = (11.99 \pm 0.13) \times 10^{-5} \text{ s}^{-1}$ ; **III**, 80 °C,  $k_{app} = (5.48 \pm 0.06) \times 10^{-5} \text{ s}^{-1}$ ; **IV**, 70 °C,  $k_{app} = (2.71 \pm 0.04) \times 10^{-5} \text{ s}^{-1}$  ( $[LA]_0 = 0.42 \text{ M}$ ,  $[Al] = 8.33 \text{ mM}$   $[LA]_0/[Al] = 50$ ).

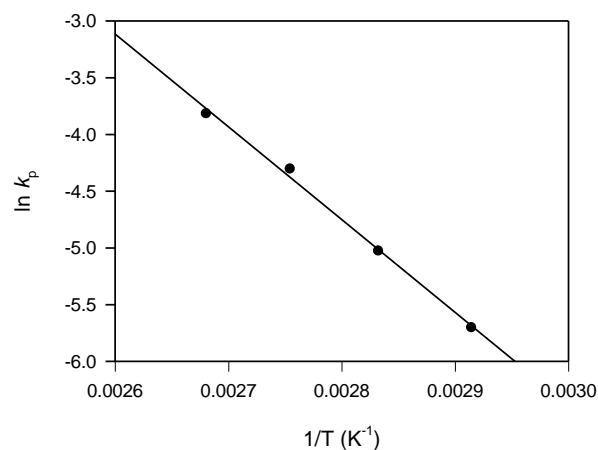

**Fig. S36** Arrhenius plot of  $\ln k_p$  versus  $1/T$  for the polymerisation of *rac*-LA with **4a**/BnOH as an initiator ( $[LA]_0/[Al] = 50$ ,  $[LA]_0 = 0.42 \text{ M}$ , toluene).

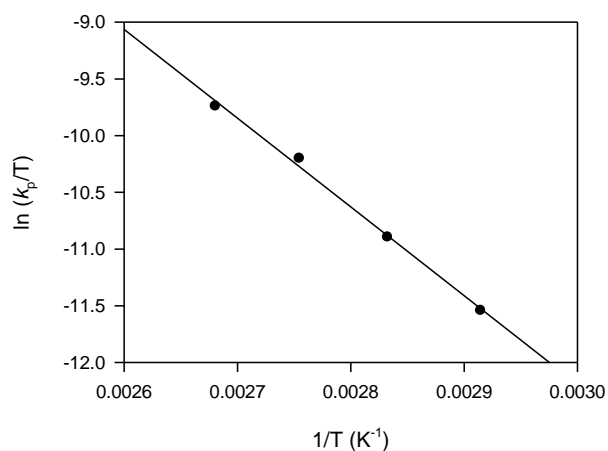

**Fig. S37** Eyring plot of  $\ln (k_p/T)$  versus  $1/T$  for the polymerisation of *rac*-LA with **4a**/BnOH as an initiator ( $[LA]_0/[Al] = 50$ ,  $[LA]_0 = 0.42 \text{ M}$ , toluene).

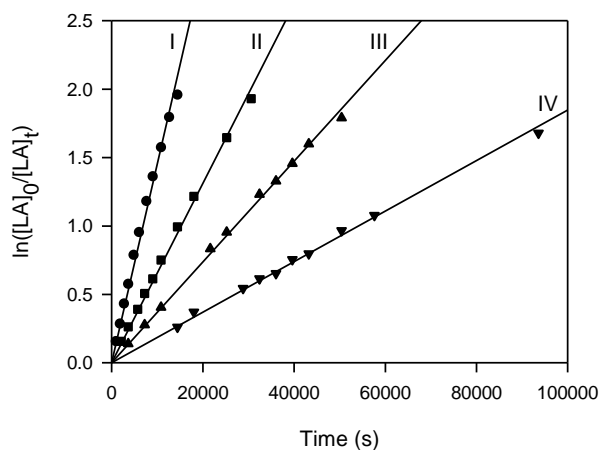

**Fig. S38** Semilogarithmic plots of the *rac*-lactide conversion versus time in toluene with complex **6a**/BnOH as an initiator at **I**, 100 °C,  $k_{app} = (14.54 \pm 0.30) \times 10^{-5} \text{ s}^{-1}$ ; **II**, 90°C,  $k_{app} = (6.30 \pm 0.10) \times 10^{-5} \text{ s}^{-1}$ ; **III**, 80°C,  $k_{app} = (3.68 \pm 0.03) \times 10^{-5} \text{ s}^{-1}$ ; **IV**, 70°C,  $k_{app} = (1.87 \pm 0.02) \times 10^{-5} \text{ s}^{-1}$  ( $[LA]_0 = 0.42 \text{ M}$ ,  $[Al] = 8.33 \text{ mM}$   $[LA]_0/[Al] = 50$ ).

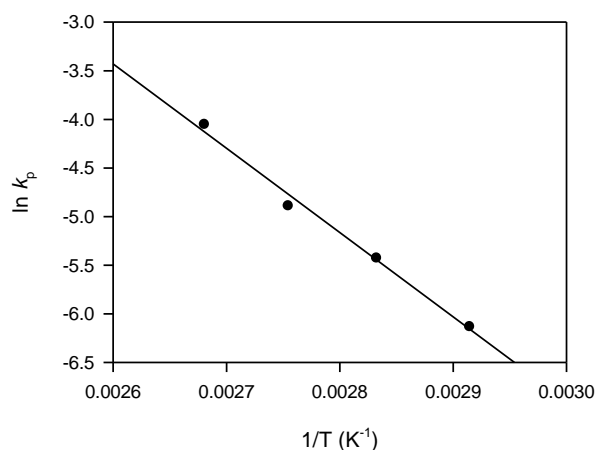

**Fig. S39** Arrhenius plot of  $\ln k_p$  versus  $1/T$  for the polymerisation of *rac*-LA with **6a**/BnOH as an initiator ( $[LA]_0/[Al] = 50$ ,  $[LA]_0 = 0.42 \text{ M}$ , toluene).

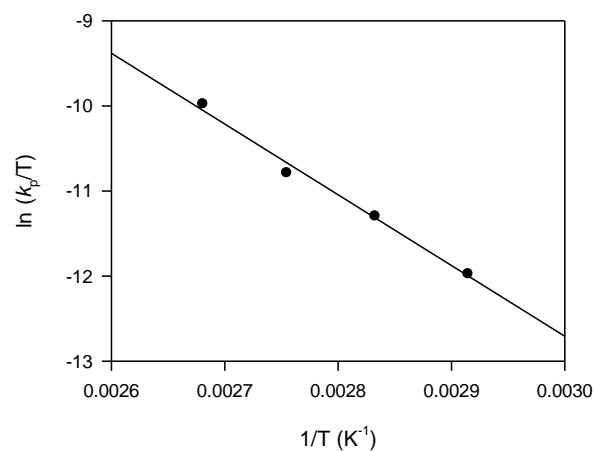

**Fig. S40** Eyring plot of  $\ln (k_p/T)$  versus  $1/T$  for the polymerisation of *rac*-LA with **6a**/BnOH as an initiator ( $[LA]_0/[Al] = 50$ ,  $[LA]_0 = 0.42 \text{ M}$ , toluene).

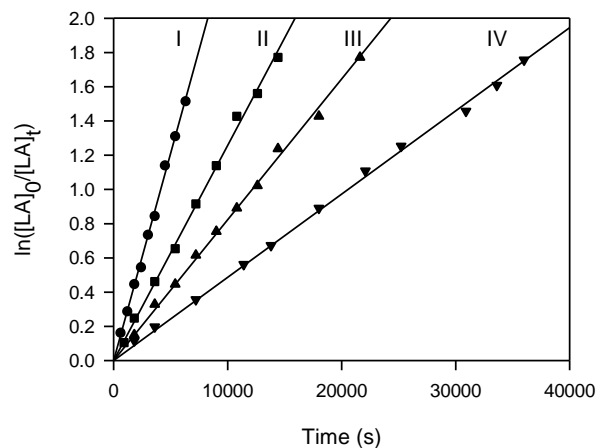

**Fig. S41** Semilogarithmic plots of the *rac*-lactide conversion *versus* time in toluene with complex **2b**/BnOH as an initiator at **I**, 100 °C,  $k_{app} = (24.23 \pm 0.29) \times 10^{-5} \text{ s}^{-1}$ ; **II**, 90 °C,  $k_{app} = (12.60 \pm 0.08) \times 10^{-5} \text{ s}^{-1}$ ; **III**, 80 °C,  $k_{app} = (8.10 \pm 0.14) \times 10^{-5} \text{ s}^{-1}$ ; **IV**, 70 °C,  $k_{app} = (4.90 \pm 0.06) \times 10^{-5} \text{ s}^{-1}$  ( $[LA]_0 = 0.42 \text{ M}$ ,  $[Al] = 8.33 \text{ mM}$   $[LA]_0/[Al] = 50$ ).

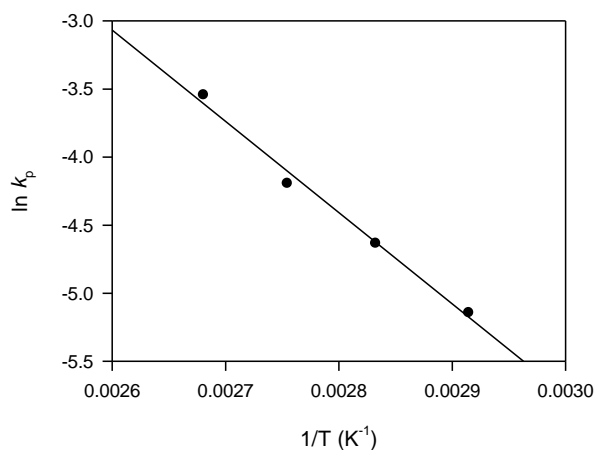

**Fig. S42** Arrhenius plot of  $\ln k_p$  *versus*  $1/T$  for the polymerisation of *rac*-LA with **2b**/BnOH as an initiator ( $[LA]_0/[Al] = 50$ ,  $[LA]_0 = 0.42 \text{ M}$ , toluene).

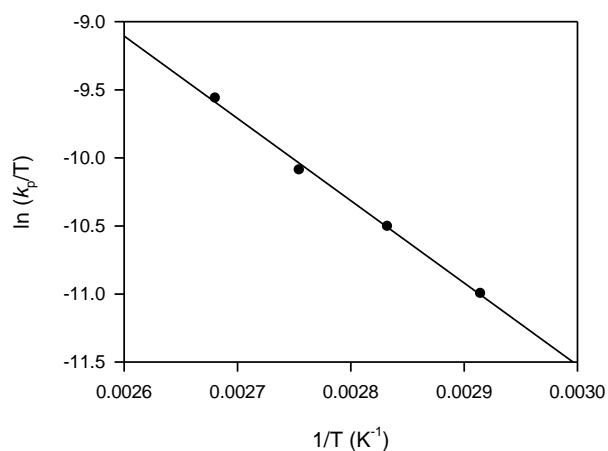

**Fig. S43** Eyring plot of  $\ln (k_p/T)$  *versus*  $1/T$  for the polymerisation of *rac*-LA with **2b**/BnOH as an initiator ( $[LA]_0/[Al] = 50$ ,  $[LA]_0 = 0.42 \text{ M}$ , toluene).

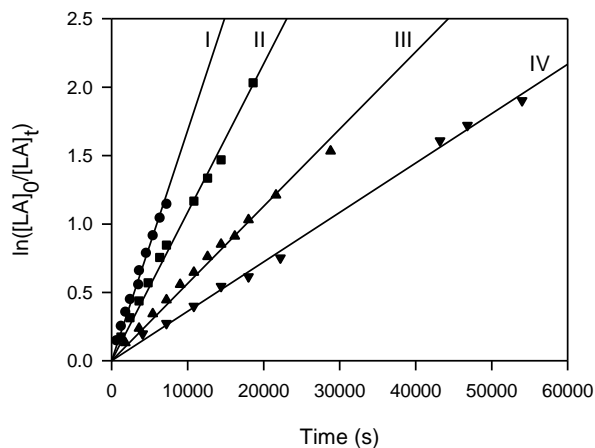

**Fig. S44** Semilogarithmic plots of the *rac*-lactide conversion *versus* time in toluene with complex **4b**/BnOH as an initiator at **I**, 100 °C,  $k_{app} = (16.83 \pm 0.54) \times 10^{-5} \text{ s}^{-1}$ ; **II**, 90 °C,  $k_{app} = (10.85 \pm 0.27) \times 10^{-5} \text{ s}^{-1}$ ; **III**, 80 °C,  $k_{app} = (5.64 \pm 0.15) \times 10^{-5} \text{ s}^{-1}$ ; **IV**, 70 °C,  $k_{app} = (3.64 \pm 0.08) \times 10^{-5} \text{ s}^{-1}$  ( $[LA]_0 = 0.42 \text{ M}$ ,  $[Al] = 8.33 \text{ mM}$   $[LA]_0/[Al] = 50$ ).

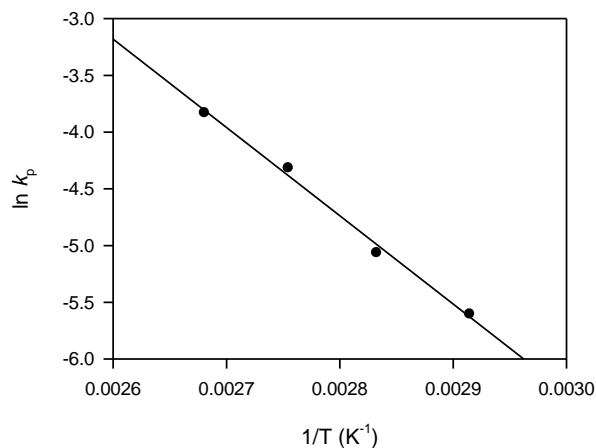

**Fig. S45** Arrhenius plot of  $\ln k_p$  *versus*  $1/T$  for the polymerisation of *rac*-LA with **4b**/BnOH as an initiator ( $[LA]_0/[Al] = 50$ ,  $[LA]_0 = 0.42 \text{ M}$ , toluene).

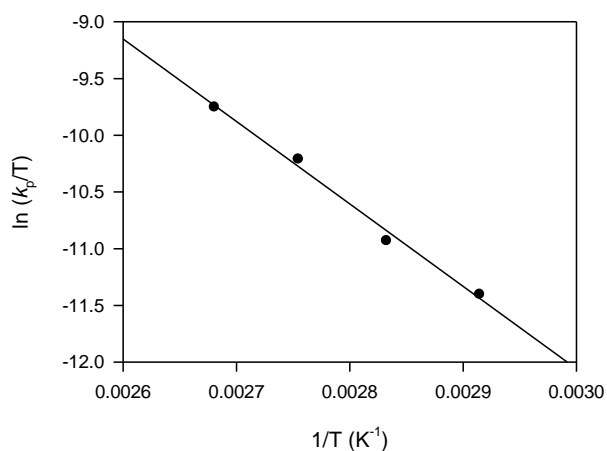

**Fig. S46** Eyring plot of  $\ln (k_p/T)$  *versus*  $1/T$  for the polymerisation of *rac*-LA with **4b**/BnOH as an initiator ( $[LA]_0/[Al] = 50$ ,  $[LA]_0 = 0.42 \text{ M}$ , toluene).

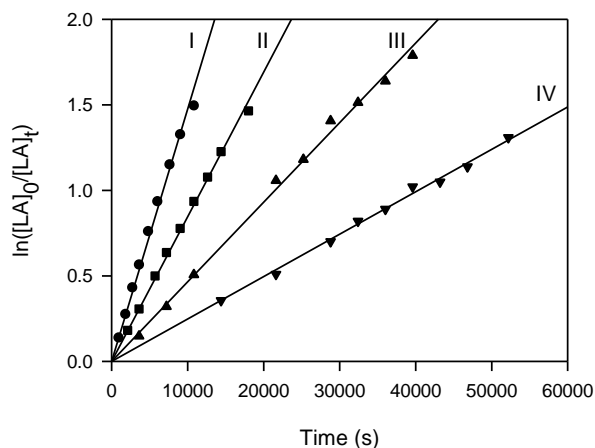

**Fig. S47** Semilogarithmic plots of the *rac*-lactide conversion *versus* time in toluene with complex **6b**/BnOH as an initiator at **I**, 100 °C,  $k_{app} = (14.74 \pm 0.26) \times 10^{-5} \text{ s}^{-1}$ ; **II**, 90 °C,  $k_{app} = (8.46 \pm 0.08) \times 10^{-5} \text{ s}^{-1}$ ; **III**, 80 °C,  $k_{app} = (4.61 \pm 0.05) \times 10^{-5} \text{ s}^{-1}$ ; **IV**, 70 °C,  $k_{app} = (2.48 \pm 0.02) \times 10^{-5} \text{ s}^{-1}$  ( $[LA]_0 = 0.42 \text{ M}$ ,  $[Al] = 8.33 \text{ mM}$   $[LA]_0/[Al] = 50$ ).

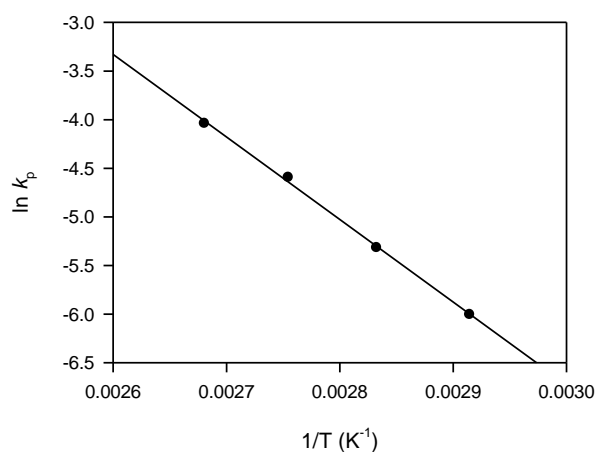

**Fig. S48** Arrhenius plot of  $\ln k_p$  *versus*  $1/T$  for the polymerisation of *rac*-LA with **6b**/BnOH as an initiator ( $[LA]_0/[Al] = 50$ ,  $[LA]_0 = 0.42 \text{ M}$ , toluene).

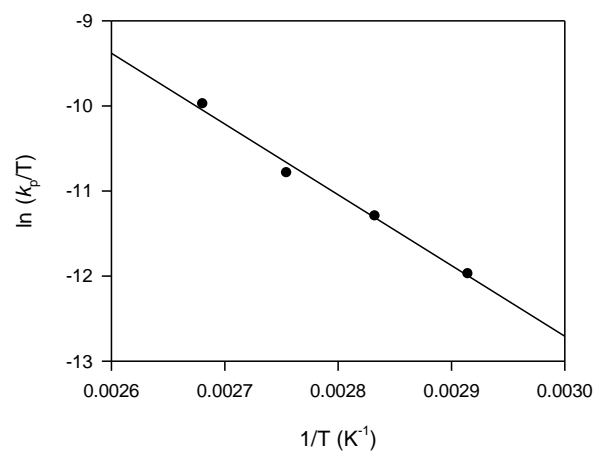

**Fig. S49** Eyring plot of  $\ln (k_p/T)$  *versus*  $1/T$  for the polymerisation of *rac*-LA with **6b**/BnOH as an initiator ( $[LA]_0/[Al] = 50$ ,  $[LA]_0 = 0.42 \text{ M}$ , toluene).

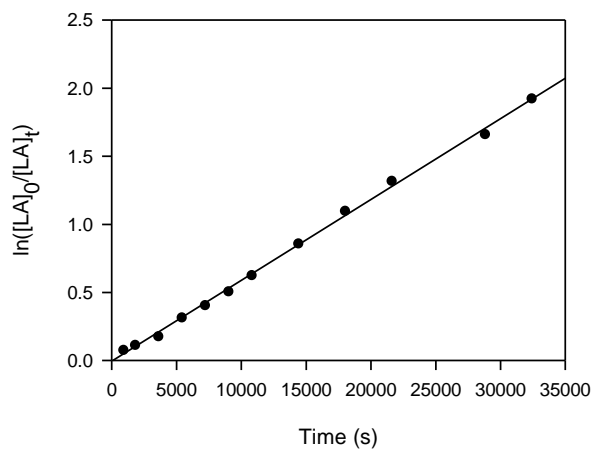

**Fig. S50** Semilogarithmic plots of *rac*-lactide conversion *versus* time in toluene at 70 °C with complex **8a** (●) ( $[LA]_0/[Al]/[BnOH] = 50:1:1$ ,  $[LA]_0 = 0.42$  M,  $[Al] = 8.33$  mM).

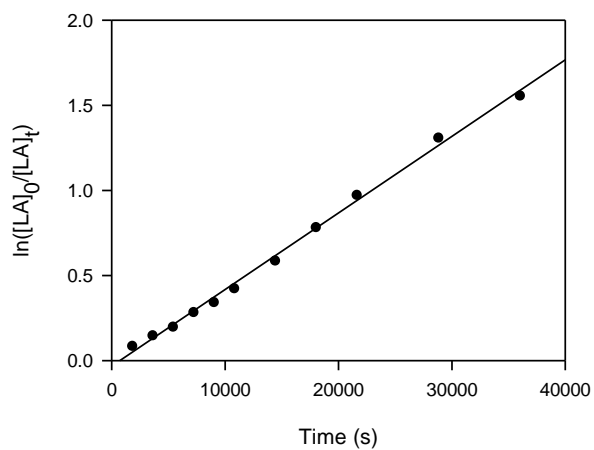

**Fig. S51** Semilogarithmic plots of *rac*-lactide conversion *versus* time in toluene at 70 °C with complex **8b** (●) ( $[LA]_0/[Al]/[BnOH] = 50:1:1$ ,  $[LA]_0 = 0.42$  M,  $[Al] = 8.33$  mM).
